# Supplementary material for: Intergenic risk variant rs56258221 skews the fate of naive CD4+ T cells via miR4464-BACH2 interplay in primary sclerosing cholangitis
Source: PubMed Central journal article supplement (PMC11293351; doi:10.1016/j.xcrm.2024.101620), 2024-06-19
Supplement: mmc1.pdf [file mmc1.pdf]

Cell Reports Medicine, Volume 5

## Supplemental information

**Intergenic risk variant *rs56258221* skews  
the fate of naive CD4<sup>+</sup> T cells via miR4464-BACH2  
interplay in primary sclerosing cholangitis**

**Tobias Poch, Jonas Bahn, Christian Casar, Jenny Krause, Ioannis Evangelakos, Hilla Gilladi, Lilly K. Kunzmann, Alena Laschtowitz, Nicola Iuso, Anne-Marie Schäfer, Laura A. Liebig, Silja Steinmann, Marcial Sebode, Trine Folseraas, Lise K. Engesæter, Tom H. Karlsen, Andre Franke, Norbert Hubner, Christian Schlein, Eithan Galun, Samuel Huber, Ansgar W. Lohse, Nicola Gagliani, Dorothee Schwinge, and Christoph Schramm**

**SUPPLEMENTARY FIGURES AND FIGURE LEGENDS**

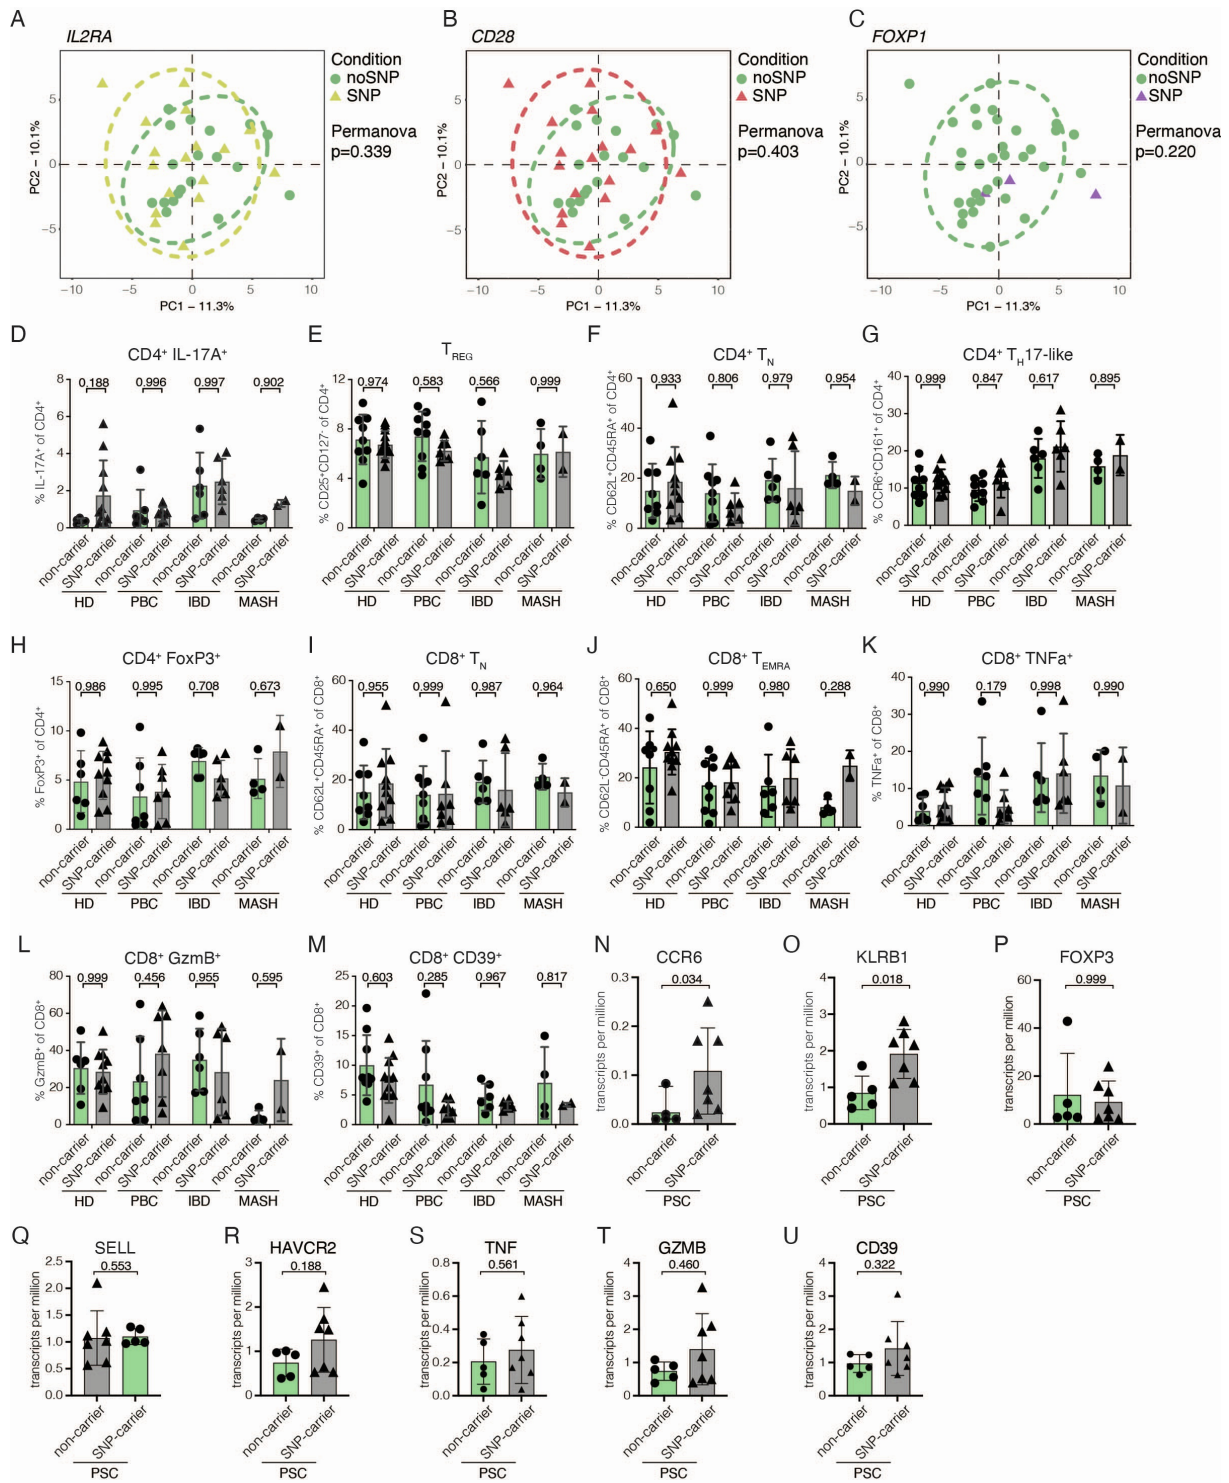

**Fig. S1: People with PSC carrying *rs56258221* show distinct immunophenotypes. Related to Figure 1.**

(A-C) Principal component analyses of the analyzed immunophenotyping data from peripheral blood of people with PSC, separated by the genotype for polymorphism *rs4147359* (*IL2RA*) (A), *rs7426056* (*CD28*) (B) and *rs80060485* (*FOXP1*) (C). (D-H) Frequencies of different CD4<sup>+</sup> T cell subsets. (D) T<sub>N</sub>, identified by CD62L/CD45RA. (E) T<sub>H</sub>17 cells identified by IL-17A expression upon stimulation with PMA/Ionomycin. (F)

T<sub>H</sub>17 cells identified by CCR6/CD161. **(G)** T<sub>REG</sub> identified by CD127/CD25. **(H)** T<sub>REG</sub> identified by FoxP3 expression upon stimulation with PMA/Ionomycin. **(I-M)** Frequencies of different CD8<sup>+</sup> T cell subsets. **(I)** T<sub>N</sub>, identified by CD62L/CD45RA. **(J)** T<sub>EMRA</sub>, identified by CD62L/CD45RA. **(K)** CD39 expression on CD8<sup>+</sup> T cells. **(L)** TNF $\alpha$  expression upon stimulation with PMA/Ionomycin. **(M)** GzmB expression upon stimulation with PMA/Ionomycin. Statistics: Normality distribution was tested by Kolmogorov-Smirnov test; normal distribution: Welch's t-Test or 2-way ANOVA; no normal distribution: Mann-Whitney U Test. p<0.05 was considered statistically significant. Data is presented as mean  $\pm$  SD and deriving from n  $\geq$  2 repeats per experiment.

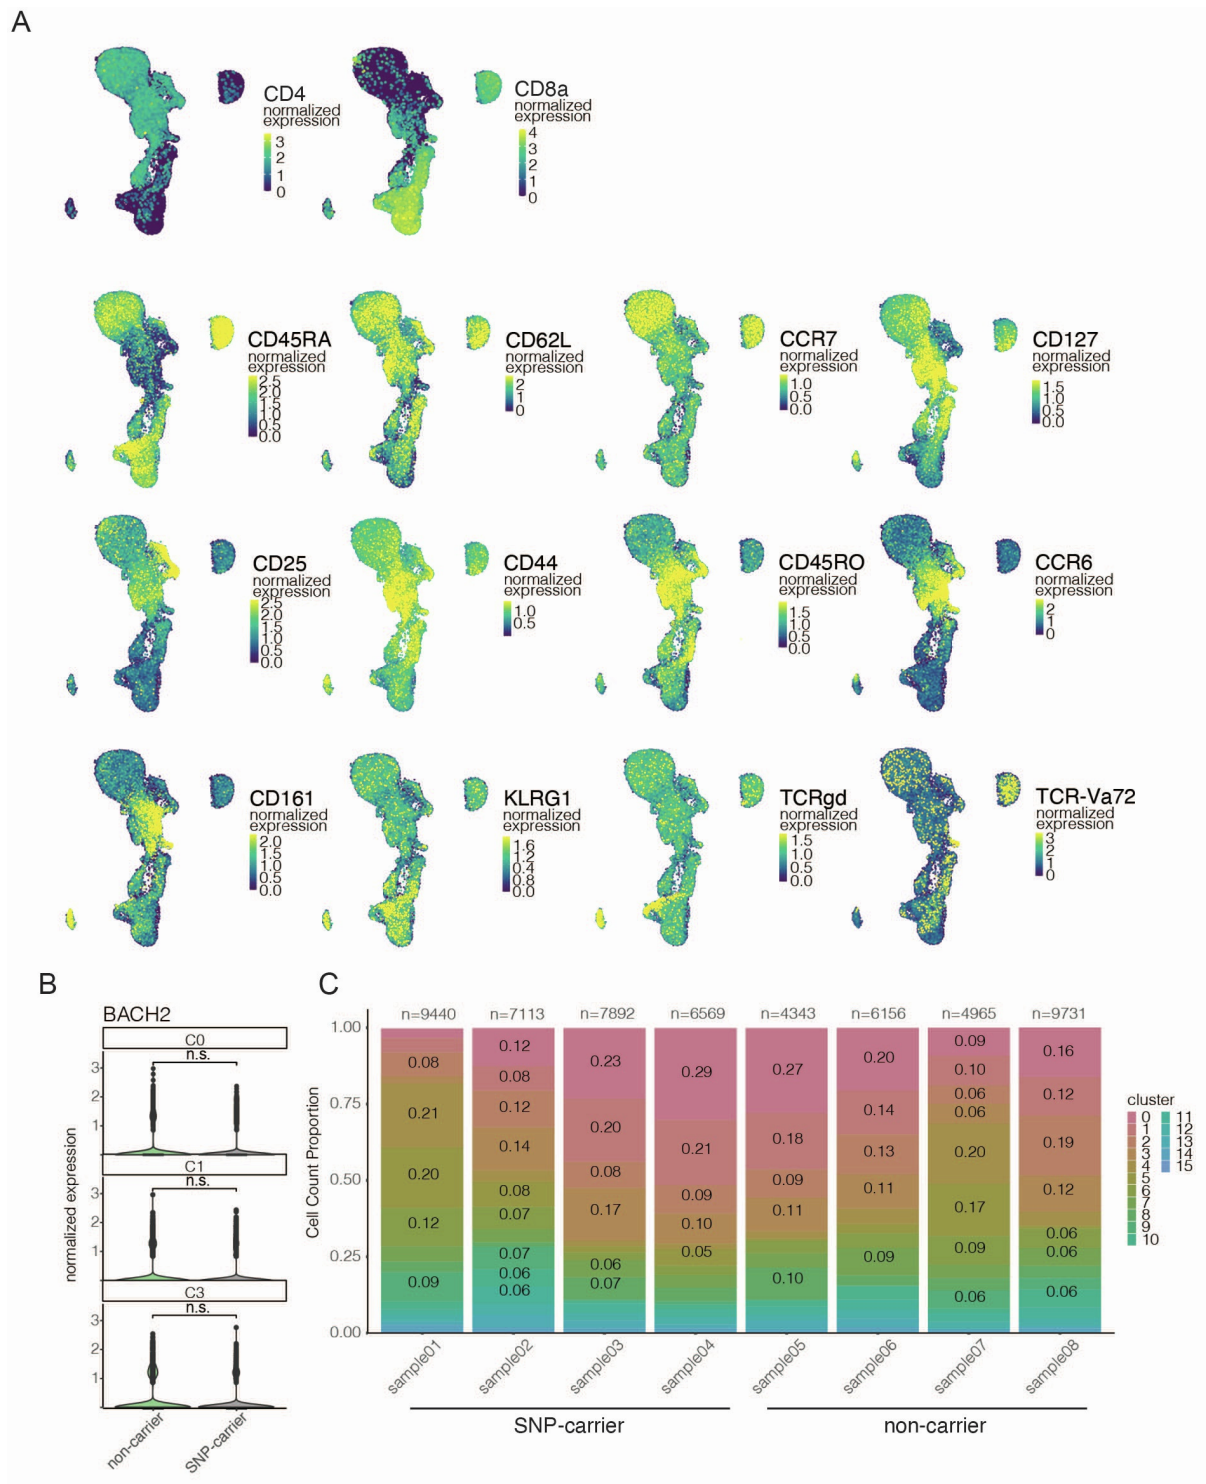

**Fig. S2: Characterization of peripheral blood T cells from homozygous carriers of *rs56258221*. Related to Figure 2.**

(A) Data of antibody-derived tags, resembling protein expression, mapped onto the UMAP from Fig. 2B.

Differentiation markers were used to assist cluster assignment. (B) BACH2 mRNA expression levels in CD4<sup>+</sup>

(C0, C1) and CD8<sup>+</sup> T<sub>N</sub> (C3) between SNP-carriers and non-carriers. (C) Distribution of cells per sample across the different clusters of T cells between SNP-carriers and non-carriers.

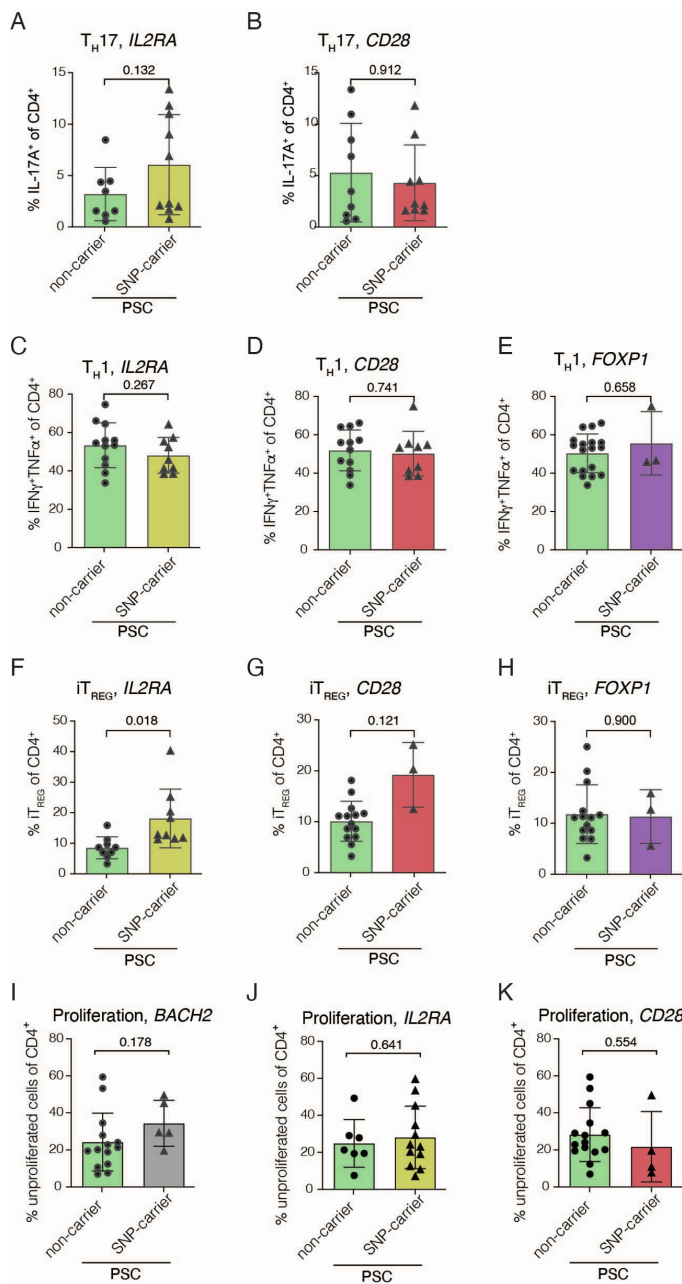

**Fig. S3: Skewed differentiation of naive CD4<sup>+</sup> T cells from people with PSC is associated with *rs56258221*.**

**Related to Figure 3.**

(A-B) After 12 d of polarizing culture of CD4<sup>+</sup> T<sub>N</sub> from patients with PSC (n=18) the frequency of CD4<sup>+</sup>IL-

17A<sup>+</sup> cells was determined and separated by *rs4147359* (*IL2RA*) (A), *rs7426056* (*CD28*) (B). *rs80060485*

(*FOXP1*) is not shown as no datapoints for SNP-carriers were recorded. (C-E) After 7 d of polarizing culture of

CD4<sup>+</sup> T<sub>N</sub> from patients with PSC (n=21), the frequency of T CD4<sup>+</sup>CXCR3<sup>+</sup>TBET<sup>+</sup>IFN $\gamma$ <sup>+</sup>TNF $\alpha$ <sup>+</sup> cells was

determined and data was separated into carriers and non-carriers of *rs4147359* (*IL2RA*) (C), *rs7426056* (*CD28*)

(D) and *rs80060485* (*FOXP1*) (E). (F-H) After 7 days of polarizing culture of CD4<sup>+</sup> T<sub>N</sub> from patients with PSC

(n=18), the frequencies of CD4<sup>+</sup>CD25<sup>+</sup>CD152<sup>+</sup>FOXP3<sup>+</sup> cells were determined and data was separated into

carriers and non-carriers of *rs4147359 (IL2RA)* (F), *rs7426056 (CD28)* (G) and *rs80060485 (FOXP1)* (H). **(I-K)**

After 6 d of non-polarizing culture of *CellTrace Violet*-marked CD4<sup>+</sup> T<sub>N</sub> from patients with PSC, the frequency of divided and undivided cells was determined by flow cytometry. Data was separated into carriers and non-carriers of *rs56258221 (BACH2)* *rs4147359 (IL2RA)* (J), *rs7426056 (CD28)* (K). Data is presented as mean ± SD and deriving from  $n \geq 2$  repeats per experiment.

SUPPLEMENTARY TABLES

Table S1: Clinical parameters of people with PSC, related to Figure 1A-M.

| patient #   | SNP-status   | gender | year of birth | IBD status         | other autoimmune disease | immunosuppr. therapy | transient elastography [kPa] | MELD-score | ANAs (Ref.: <1:80) | SMA (Ref.: <1:80) | SLA/LP (Ref.: <20relU/ml) |
|-------------|--------------|--------|---------------|--------------------|--------------------------|----------------------|------------------------------|------------|--------------------|-------------------|---------------------------|
| patient #1  | non-carrier  | cis    | 1967          | PSC-assoc. colitis | /                        | /                    | 10                           | 6,0        | negative           | negative          | negative                  |
| patient #2  | non-carrier  | cis    | 1968          | PSC-assoc. colitis | Hashimoto's disease      | /                    | 8,8                          | 7,1        | 1:80               | negative          | negative                  |
| patient #3  | non-carrier  | cis    | 1983          | /                  | /                        | /                    | 4,5                          | 6,8        | negative           | negative          | negative                  |
| patient #4  | non-carrier  | cis    | 1957          | PSC-assoc. colitis | /                        | /                    | 3,9                          | 6,0        | 1:80               | negative          | negative                  |
| patient #5  | non-carrier  | cis    | 1968          | /                  | /                        | /                    | 5,3                          | 6,0        | negative           | n.a.              | n.a.                      |
| patient #6  | non-carrier  | cis    | 1982          | PSC-assoc. colitis | /                        | /                    | 60,4                         | 33,4       | 1:640              | negative          | negative                  |
| patient #7  | non-carrier  | cis    | 1968          | PSC-assoc. colitis | /                        | /                    | 4,7                          | 6,0        | 1:80               | negative          | negative                  |
| patient #8  | non-carrier  | cis    | 1965          | /                  | /                        | /                    | 16,5                         | 15,8       | 1:160              | negative          | negative                  |
| patient #9  | non-carrier  | cis    | 1955          | /                  | /                        | /                    | 6,3                          | 6,0        | negative           | negative          | negative                  |
| patient #10 | non-carrier  | cis    | 1959          | /                  | /                        | /                    | 5,7                          | 6,0        | 1:80               | negative          | negative                  |
| patient #11 | non-carrier  | cis    | 1965          | PSC-assoc. colitis | /                        | Azathioprine         | 32                           | 6,9        | 1:640              | 1:160             | negative                  |
| patient #12 | non-carrier  | cis    | 1967          | PSC-assoc. colitis | /                        | /                    | 4,9                          | 6,7        | 1:320              | negative          | negative                  |
| patient #13 | non-carrier  | cis    | 1978          | PSC-assoc. colitis | Graves' disease          | /                    | 4,7                          | 6,0        | 1:160              | 1:80              | negative                  |
| patient #14 | non-carrier  | cis    | 1977          | PSC-assoc. colitis | /                        | Azathioprine         | 4                            | 6,2        | negative           | negative          | negative                  |
| patient #15 | non-carrier  | cis    | 1974          | PSC-assoc. colitis | /                        | /                    | 3,7                          | 6,0        | 1:320              | negative          | negative                  |
| patient #16 | non-carrier  | cis    | 1982          | PSC-assoc. colitis | /                        | /                    | 4,3                          | 6,0        | 1:320              | negative          | negative                  |
| patient #17 | non-carrier  | cis    | 1941          | /                  | /                        | /                    | 4,1                          | 6,0        | negative           | negative          | negative                  |
| patient #18 | non-carrier  | cis    | 1966          | /                  | /                        | /                    | 7,8                          | 6,0        | 1:160              | negative          | negative                  |
| patient #19 | heterozygous | cis    | 1950          | PSC-assoc. colitis | /                        | /                    | 7,6                          | 6,0        | 1:1280             | negative          | negative                  |
| patient #20 | heterozygous | cis    | 1979          | PSC-assoc. colitis | /                        | /                    | 34,4                         | 13,0       | 1:5120             | 1:180             | negative                  |
| patient #21 | heterozygous | cis    | 1979          | PSC-assoc. colitis | /                        | /                    | 11,7                         | 6,0        | 1:320              | negative          | negative                  |
| patient #22 | heterozygous | cis    | 1953          | PSC-assoc. colitis | /                        | /                    | 3,5                          | 6,0        | 1:320              | negative          | negative                  |
| patient #23 | heterozygous | cis    | 1986          | PSC-assoc. colitis | /                        | /                    | 7,5                          | 7,2        | 1:80               | negative          | negative                  |
| patient #24 | heterozygous | cis    | 1978          | PSC-assoc. colitis | /                        | /                    | 4,4                          | 6,0        | 1:320              | 1:320             | negative                  |
| patient #25 | heterozygous | cis    | 1958          | /                  | /                        | /                    | n.a.                         | 18,9       | 1:160              | 1:80              | negative                  |
| patient #26 | heterozygous | cis    | 1963          | /                  | /                        | /                    | 70                           | 14,5       | 1:320              | 1:80              | negative                  |
| patient #27 | heterozygous | cis    | 1957          | PSC-assoc. colitis | Hashimoto's disease      | /                    | 7,2                          | 6,0        | 1:80               | 1:80              | negative                  |
| patient #28 | heterozygous | cis    | 1976          | /                  | /                        | /                    | 11,3                         | 7,8        | 1:160              | negative          | negative                  |
| patient #29 | heterozygous | cis    | 1969          | PSC-assoc. colitis | DM type 1                | /                    | 6,6                          | 7,7        | 1:320              | 1:160             | negative                  |
| patient #30 | heterozygous | cis    | 1952          | PSC-assoc. colitis | /                        | /                    | n.a.                         | 9,6        | 1:160              | negative          | negative                  |
| patient #31 | heterozygous | cis    | 1977          | PSC-assoc. colitis | /                        | /                    | 4,8                          | 6,0        | 1:180              | negative          | negative                  |
| patient #32 | heterozygous | cis    | 1969          | /                  | /                        | /                    | 3,6                          | 6,0        | 1:160              | negative          | negative                  |
| patient #33 | heterozygous | cis    | 1956          | Crohn's disease    | Graves' disease          | /                    | n.a.                         | 21,1       | 1:640              | negative          | n.a.                      |
| patient #34 | homozygous   | cis    | 1957          | PSC-assoc. colitis | /                        | /                    | 7,1                          | 7,5        | 1:640              | negative          | negative                  |
| patient #35 | homozygous   | cis    | 1969          | PSC-assoc. colitis | /                        | /                    | 6                            | 6,8        | 1:1280             | negative          | negative                  |
| patient #36 | homozygous   | cis    | 1963          | PSC-assoc. colitis | /                        | /                    | 37,4                         | 6,0        | 1:640              | negative          | negative                  |

**Table S2: Clinical parameters of people with PSC, related to Figure 2A-J.**

| patient #  | SNP-status  | gender | year of birth | IBD status         | other autoimmune disease | immunosuppr. therapy | transient elastography [kPa] | MELD-Score | ANAs (Ref.: <1:80) | SMA (Ref.: <1:80) | SLA/LP (Ref.: <20relU/ml) |
|------------|-------------|--------|---------------|--------------------|--------------------------|----------------------|------------------------------|------------|--------------------|-------------------|---------------------------|
| patient #1 | homozygous  | cis    | 1969          | PSC-assoc. colitis | /                        | /                    | 6                            | 6,8        | 1:1280             | negative          | negative                  |
| patient #2 | homozygous  | cis    | 1987          | /                  | /                        | /                    | 20                           | 11,8       | 1:320              | negative          | negative                  |
| patient #3 | homozygous  | cis    | 1980          | PSC-assoc. colitis | /                        | Vedolizumab          | 5,6                          | 6,0        | negative           | negative          | negative                  |
| patient #4 | homozygous  | cis    | 1975          | PSC-assoc. colitis | /                        | /                    | 5,3                          | 6,0        | negative           | 1:80              | negative                  |
| patient #5 | non-carrier | cis    | 1966          | /                  | /                        | /                    | 7,8                          | 6,0        | 1:160              | negative          | negative                  |
| patient #6 | non-carrier | cis    | 1979          | /                  | /                        | /                    | 4,7                          | 6,0        | 1:160              | negative          | negative                  |
| patient #7 | non-carrier | cis    | 1976          | /                  | /                        | /                    | 6,3                          | 6,0        | 1:160              | negative          | negative                  |
| patient #8 | non-carrier | cis    | 1972          | Crohn's disease    | /                        | /                    | 6,7                          | 6,0        | 1:160              | negative          | negative                  |



**Table S3: Clinical parameters of people with PSC, related to Figures 2K-L and 4D.**

| patient #   | SNP-status  | gender | year of birth | IBD status         | other autoimmune disease | immunosuppr. therapy | transient elastography [kPa] | MELD-Score | ANAs (Ref.: <1:80) | SMA (Ref.: <1:80) | SLA/LP (Ref.: <20relU/ml) |
|-------------|-------------|--------|---------------|--------------------|--------------------------|----------------------|------------------------------|------------|--------------------|-------------------|---------------------------|
| patient #1  | non-carrier | cis    | 1966          | /                  | /                        | /                    | 7,8                          | 6,0        | 1:160              | negative          | negative                  |
| patient #2  | non-carrier | cis    | 1979          | /                  | /                        | /                    | 4,7                          | 6,0        | 1:160              | negative          | negative                  |
| patient #3  | non-carrier | cis    | 1976          | /                  | /                        | /                    | 6,3                          | 6,0        | 1:160              | negative          | negative                  |
| patient #4  | non-carrier | cis    | 1972          | Crohn's disease    | /                        | /                    | 6,7                          | 6,0        | 1:160              | negative          | negative                  |
| patient #5  | non-carrier | cis    | 1980          | PSC-assoc. colitis | /                        | /                    | 7,8                          | 6,0        | 1:160              | negative          | negative                  |
| patient #6  | non-carrier | cis    | 1994          | PSC-assoc. colitis | /                        | Azathioprin          | 4,9                          | 6,0        | 1:320              | 1:80              | negative                  |
| patient #7  | non-carrier | cis    | 1975          | PSC-assoc. colitis | Psoriasis vulgaris       | Ustekinumab          | 6,3                          | 6,0        | 1:160              | negative          | negative                  |
| patient #8  | homozygous  | cis    | 1944          | PSC-assoc. colitis | /                        | /                    | 14,3                         | 14,1       | 1:160              | 1:80              | negative                  |
| patient #9  | homozygous  | cis    | 1957          | PSC-assoc. colitis | /                        | /                    | 7,1                          | 7,5        | 1:640              | negative          | negative                  |
| patient #10 | homozygous  | cis    | 1986          | PSC-assoc. colitis | /                        | /                    | 5,2                          | 6,0        | 1:640              | 1:80              | negative                  |
| patient #11 | homozygous  | cis    | 1972          | PSC-assoc. colitis | /                        | /                    | 43,8                         | 14,5       | 1:320              | negative          | negative                  |
| patient #12 | homozygous  | cis    | 1963          | PSC-assoc. colitis | /                        | /                    | 37,4                         | 6,0        | 1:640              | negative          | negative                  |
| patient #13 | homozygous  | cis    | 1969          | PSC-assoc. colitis | /                        | /                    | 6                            | 6,8        | 1:1280             | negative          | negative                  |
| patient #14 | homozygous  | cis    | 1987          | /                  | /                        | /                    | 20                           | 11,8       | 1:320              | negative          | negative                  |
| patient #15 | homozygous  | cis    | 1980          | PSC-assoc. colitis | /                        | Vedolizumab          | 5,6                          | 6,0        | negative           | negative          | negative                  |
| patient #16 | homozygous  | cis    | 1975          | PSC-assoc. colitis | /                        | /                    | 5,3                          | 6,0        | negative           | 1:80              | negative                  |

**Table S4: Clinical parameters of people with PSC, related to Figure 3H+K.**

| patient #   | SNP-Status   | gender | year of birth | IBD status         | other autoimmune disease | immunosuppr. therapy | transient elastography [kPa] | MELD-score | ANAs (Ref.: <1:80) | SMA (Ref.: <1:80) | SLA/LP (Ref.: <20relU/ml) |
|-------------|--------------|--------|---------------|--------------------|--------------------------|----------------------|------------------------------|------------|--------------------|-------------------|---------------------------|
| patient #1  | non-carrier  | cis    | 1982          | PSC-assoc. colitis | /                        | /                    | 4,3                          | 6,0        | 1:320              | negative          | negative                  |
| patient #2  | non-carrier  | cis    | 1977          | PSC-assoc. colitis | /                        | /                    | 6                            | 6,0        | 1:80               | 1:80              | negative                  |
| patient #3  | non-carrier  | cis    | 1967          | PSC-assoc. colitis | /                        | /                    | 4,9                          | 6,7        | 1:320              | negative          | negative                  |
| patient #4  | non-carrier  | cis    | 1967          | PSC-assoc. colitis | /                        | /                    | 6,1                          | 6,0        | 1:160              | negative          | negative                  |
| patient #5  | non-carrier  | cis    | 1980          | PSC-assoc. colitis | /                        | /                    | 2,1                          | 9,9        | 1:640              | negative          | negative                  |
| patient #6  | non-carrier  | cis    | 1977          | PSC-assoc. colitis | /                        | /                    | 7,6                          | 6,0        | 1:160              | negative          | negative                  |
| patient #7  | non-carrier  | cis    | 1972          | PSC-assoc. colitis | /                        | /                    | 23                           | 6,0        | negative           | negative          | negative                  |
| patient #8  | non-carrier  | cis    | 1987          | /                  | /                        | /                    | 75                           | 6,0        | negative           | negative          | negative                  |
| patient #9  | non-carrier  | cis    | 1964          | /                  | /                        | /                    | 4,7                          | 6,0        | 1:160              | negative          | negative                  |
| patient #10 | non-carrier  | cis    | 1975          | PSC-assoc. colitis | /                        | Azathioprin          | 14                           | 7,1        | 1:160              | negative          | 23.0                      |
| patient #11 | non-carrier  | cis    | 1976          | PSC-assoc. colitis | Hashimoto's disease      | /                    | 7,4                          | 6,0        | 1:80               | negative          | negative                  |
| patient #12 | heterozygous | cis    | 1964          | PSC-assoc. colitis | /                        | /                    | 4,8                          | 6,9        | 1:320              | negative          | negative                  |
| patient #13 | heterozygous | cis    | 1950          | PSC-assoc. colitis | /                        | /                    | 7,6                          | 6,0        | 1:1280             | negative          | negative                  |
| patient #14 | heterozygous | cis    | 1961          | PSC-assoc. colitis | Rheumatoid arthritis     | Baricitinib          | 12,9                         | 6,0        | 1:160              | negative          | negative                  |
| patient #15 | heterozygous | cis    | 1980          | PSC-assoc. colitis | /                        | /                    | 6,1                          | 6,0        | 1:80               | negative          | negative                  |
| patient #16 | heterozygous | cis    | 1953          | PSC-assoc. colitis | /                        | /                    | 3,5                          | 6,0        | 1:320              | negative          | negative                  |
| patient #17 | homozygous   | cis    | 1963          | PSC-assoc. colitis | /                        | /                    | 37,4                         | 6,0        | 1:640              | negative          | negative                  |
| patient #18 | homozygous   | cis    | 1994          | PSC-assoc. colitis | /                        | /                    | 71                           | 6,6        | 1:640              | 1:160             | negative                  |
| patient #19 | homozygous   | cis    | 1980          | PSC-assoc. colitis | /                        | /                    | 5,6                          | 6,0        | negative           | negative          | negative                  |

**Table S5: Clinical parameters of people with PSC, related to Figure 3G+J.**

| patient #   | SNP-status   | gender | year of birth | IBD status         | other autoimmune disease | immunosuppr. therapy | transient elastography [kPa] | MELD-score | ANAs (Ref.: <1:80) | SMA (Ref.: <1:80) | SLA/LP (Ref.: <20relU/ml) |
|-------------|--------------|--------|---------------|--------------------|--------------------------|----------------------|------------------------------|------------|--------------------|-------------------|---------------------------|
| patient #1  | non-carrier  | cis    | 1997          | Crohn's disease    | /                        | /                    | 7                            | 8,3        | 1:160              | negative          | negative                  |
| patient #2  | non-carrier  | cis    | 1956          | /                  | /                        | /                    | 4,5                          | 6,0        | 1:160              | negative          | negative                  |
| patient #3  | non-carrier  | cis    | 1962          | PSC-assoc. colitis | /                        | /                    | 5,6                          | 6,0        | 1:80               | 1:160             | negative                  |
| patient #4  | non-carrier  | cis    | 1980          | PSC-assoc. colitis | /                        | /                    | 2,1                          | 9,9        | 1:640              | negative          | negative                  |
| patient #5  | non-carrier  | cis    | 1951          | PSC-assoc. colitis | /                        | Vedolizumab          | 4,3                          | 6,0        | 1:160              | negative          | negative                  |
| patient #6  | non-carrier  | cis    | 1974          | PSC-assoc. colitis | /                        | /                    | 3,7                          | 6,0        | 1:320              | negative          | negative                  |
| patient #7  | non-carrier  | cis    | 1950          | /                  | /                        | /                    | 4,6                          | 6,0        | 1:5120             | negative          | negative                  |
| patient #8  | non-carrier  | cis    | 1980          | PSC-assoc. colitis | /                        | /                    | 7,8                          | 6,0        | 1:160              | negative          | negative                  |
| patient #9  | non-carrier  | cis    | 1987          | PSC-assoc. colitis | /                        | /                    | 5,8                          | 6,0        | 1:640              | 1:160             | negative                  |
| patient #10 | non-carrier  | cis    | 1987          | PSC-assoc. colitis | /                        | /                    | 6,1                          | 6,0        | 1:160              | negative          | negative                  |
| patient #11 | non-carrier  | cis    | 1962          | PSC-assoc. colitis | /                        | /                    | 3,3                          | 6,0        | 1:80               | negative          | negative                  |
| patient #12 | heterozygous | cis    | 1999          | PSC-assoc. colitis | /                        | Fligotinib           | 4,7                          | 6,0        | 1:80               | negative          | negative                  |
| patient #13 | heterozygous | cis    | 1977          | PSC-assoc. colitis | /                        | /                    | 4,8                          | 6,0        | 1:180              | negative          | negative                  |
| patient #14 | heterozygous | cis    | 1966          | /                  | Hashimoto's disease      | /                    | 4,2                          | 6,0        | 1:160              | negative          | negative                  |
| patient #15 | heterozygous | cis    | 1988          | PSC-assoc. colitis | /                        | /                    | 7,8                          | 6,0        | 1:160              | negative          | negative                  |
| patient #16 | heterozygous | cis    | 1968          | PSC-assoc. colitis | /                        | /                    | 42                           | 16,0       | 1:5120             | negative          | n.a.                      |
| patient #17 | heterozygous | cis    | 1957          | /                  | /                        | /                    | 6,6                          | 6,0        | 1:160              | negative          | negative                  |
| patient #18 | heterozygous | cis    | 1976          | PSC-assoc. colitis | /                        | /                    | 4,9                          | 6,0        | 1:80               | negative          | negative                  |
| patient #19 | heterozygous | cis    | 2000          | Crohn's disease    | /                        | Ustekinumab          | 3,7                          | 6,0        | 1:1280             | negative          | negative                  |
| patient #20 | heterozygous | cis    | 1969          | /                  | /                        | /                    | 3,6                          | 6,0        | 1:160              | negative          | negative                  |
| patient #21 | heterozygous | cis    | 1977          | /                  | /                        | /                    | 4,9                          | 7,5        | 1:160              | negative          | negative                  |

**Table S6: Clinical parameters of people with PSC, related to Figure 3F+I.**

| patient #   | SNP-status   | gender | year of birth | IBD status         | other autoimmune disease | immunosuppr. therapy | transient elastography [kPa] | MELD-score | ANAs (Ref.: <1:80) | SMA (Ref.: <1:80) | SLA/LP (Ref.: <20relU/ml) |
|-------------|--------------|--------|---------------|--------------------|--------------------------|----------------------|------------------------------|------------|--------------------|-------------------|---------------------------|
| patient #1  | non-carrier  | cis    | 1988          | PSC-assoc. colitis | /                        | /                    | 28                           | 6,0        | 1:80               | 1:160             | negative                  |
| patient #2  | non-carrier  | cis    | 1961          | Crohn's disease    | Hashimoto's disease      | /                    | 4,7                          | 6,0        | 1:320              | negative          | negative                  |
| patient #3  | non-carrier  | cis    | 1977          | PSC-assoc. colitis | Hashimoto's disease      | /                    | 10,4                         | 7,4        | 1:640              | negative          | negative                  |
| patient #4  | non-carrier  | cis    | 1963          | /                  | /                        | /                    | 6,2                          | 6,0        | 1:80               | 1:80              | negative                  |
| patient #5  | non-carrier  | cis    | 1979          | /                  | /                        | /                    | 4,7                          | 6,0        | 1:160              | negative          | negative                  |
| patient #6  | non-carrier  | cis    | 1988          | Crohn's disease    | /                        | Vedolizumab          | 8,8                          | 12,8       | 1:640              | negative          | negative                  |
| patient #7  | heterozygous | cis    | 1967          | /                  | /                        | /                    | 9,3                          | 6,0        | 1:160              | negative          | negative                  |
| patient #8  | heterozygous | cis    | 1975          | PSC-assoc. colitis | /                        | /                    | 7,1                          | 6,0        | 1:160              | negative          | negative                  |
| patient #9  | heterozygous | cis    | 1976          | /                  | /                        | /                    | 7,4                          | 6,0        | 1:320              | negative          | negative                  |
| patient #10 | heterozygous | cis    | 1976          | PSC-assoc. colitis | /                        | /                    | 4,9                          | 6,0        | 1:80               | negative          | negative                  |
| patient #11 | heterozygous | cis    | 1950          | /                  | /                        | /                    | 9,3                          | 6,0        | 1:160              | negative          | negative                  |
| patient #12 | heterozygous | cis    | 1950          | PSC-assoc. colitis | /                        | /                    | 12,7                         | 7,2        | 1:320              | negative          | negative                  |
| patient #13 | heterozygous | cis    | 1965          | /                  | /                        | /                    | 6,7                          | 6,0        | 1:160              | negative          | negative                  |
| patient #14 | heterozygous | cis    | 1965          | /                  | /                        | /                    | 5                            | 6,0        | 1:320              | negative          | negative                  |
| patient #15 | heterozygous | cis    | 1959          | PSC-assoc. colitis | /                        | /                    | 12,3                         | 6,0        | 1:5120             | negative          | negative                  |
| patient #16 | homozygous   | cis    | 1963          | PSC-assoc. colitis | /                        | /                    | 37,4                         | 6,0        | 1:640              | negative          | negative                  |
| patient #17 | homozygous   | cis    | 1944          | PSC-assoc. colitis | /                        | /                    | 14,3                         | 14,1       | 1:160              | 1:80              | negative                  |

\*Abbreviations:

*n.a.*: information not available

/: patient without IBD; no immunosuppressive therapy; absence of tested autoantibodies

**Table S7: Primers for generation of BACH2 plasmid, related to Figure 5F-H.**

| <b>Primer</b> | <b>Sequence</b>                                                                                                                                         | <b>Gene</b>                                                          |
|---------------|---------------------------------------------------------------------------------------------------------------------------------------------------------|----------------------------------------------------------------------|
| Pr1           | CACACGAGCTCGATACTGTACAGTAATGG                                                                                                                           | Forward primer (3'UTR BACH2-mRNA)                                    |
| Pr2           | CACACGTCGACAAAGCAAAGAATATACAG                                                                                                                           | Reverse primer (3'UTR BACH2-mRNA)                                    |
| Fr1           | (SacI)GAGCTCGATACTGTACANCCACTGGTCAACTTTGCCACTTGCA<br>CTGAGTTTTGGGTCAAACCTATTTTCTTAAATGAAGTTGTAACCTTCG<br>GTATAACTCAAGTATACTGTATATTCTTTGCTTTGTCGAC(SalI) | BACH2 3'UTR fragment (miR4464 site in bold letters)                  |
| Pr4           | GAAAATACTCGAGACCCAAAACCTCAGTGC                                                                                                                          | Reverse primer (to mutate the miR4464 site)                          |
| Fr2           | (SacI)GAGCTCGATACTGTACANCCACTGGTCAACTTTGCCACTTGCA<br>CTGAGTTTTGGGTCTCGAGTATTTTCTTAAATGAAGTTGTAACCTTCG<br>GTATAACTCAAGTATACTGTATATTCTTTGCTTTGTCGAC(SalI) | Mutated miR-4464 site in BACH2 3'-UTR (mutated part in bold letters) |
